# Supplementary material for: Kinematic Analysis of a Partially Decoupled 3-DOF Parallel Wrist
Source: Hindawi journal article supplement (doi:10.1155/2015/790414), 2015-01-01
Supplement: f1 [file 790414.f1.zip]

Archive with 4 entries (4 files):
- a 2015-8-7.mp4
- b 2015-8-7.mp4
- c 2015-8-7.mp4
- d 2015-8-7.mp4
